# Supplementary material for: The Antigen ASB4 on Cancer Stem Cells Serves as a Target for CTL Immunotherapy of Colorectal Cancer
Source: Oxford University Press journal article supplement (doi:10.1158/2326-6066.cir-17-0518), 2018-01-25
Supplement: 23266066cir170518-sup-189338_2_supp_4500033_p2dxq5.docx [file 23266066cir170518-sup-189338_2_supp_4500033_p2dxq5.docx]

| **Sequence** | **Length** | **UniProt ID** | **Protein name** | **Gene name** | **SP-H** | **MP-A** |
| --- | --- | --- | --- | --- | --- | --- |
| DREEEPQL | 8 | Q9NRJ7 | Protocadherin beta-16 | PCDHB16 | ✓ |  |
| DREEQPEI | 8 | Q9Y5E7 | Protocadherin beta-2 | PCDHB2 | ✓ |  |
| FKDEQRFQ | 8 | Q70EK8 | Inactive ubiquitin carboxyl-terminal hydrolase 53 | USP53 |  | ✓ |
| FQDEQRFQ | 8 | Q70EL1-1 | Inactive ubiquitin carboxyl-terminal hydrolase 54 | USP54 |  | ✓ |
| GTPGKKGT | 8 | Q5JS37 | NHL repeat-containing protein 3 | NHLRC3 | ✓ |  |
| GTPKGKTG | 8 | Q92900 | Regulator of nonsense transcripts 1 | UPF1 | ✓ |  |
| GYCDGSGP | 8 | Q9H2S9 | Zinc finger protein Eos | IKZF4 |  | ✓ |
| KTLVLVVA | 8 | O14763 | Tumor necrosis factor receptor superfamily member 10B | TNFRSF10B |  | ✓ |
| KYGPIRQI | 8 | Q9Y3B4 | Splicing factor 3B subunit 6 | SF3B6 | ✓ | ✓ |
| KYPGIRQI | 8 | O95602 | DNA-directed RNA polymerase I subunit RPA1 | POLR1A | ✓ |  |
| LAAKTVLA | 8 | Q9Y2X3 | Nucleolar protein 58 | NOP58 |  | ✓ |
| MKAIYHML | 8 | Q9Y487 | V-type proton ATPase 116 kDa subunit a isoform 2 | ATP6V0A2 |  | ✓ |
| PPGFSPFR | 8 | P01042 | kininogen-1 | KNG1 |  | ✓ |
| REVDIGIP | 8 | P55072 | Transitional endoplasmic reticulum ATPase | VCP |  | ✓ |
| RYGNVSHF | 8 | Q9H5I1 | Histone-lysine N-methyltransferase SUV39H2 | SUV39H2 |  | ✓ |
| SRMSLRKM | 8 | Q96N67 | Dedicator of cytokinesis protein 7 | DOCK7 |  | ✓ |
| TYDKGYQF | 8 | P50542-1 | Peroxisomal targeting signal 1 receptor | PEX5 | ✓ | ✓ |
| YNHDMKRK | 8 | Q9Y2D8 | Afadin- and alpha-actinin-binding protein | SSX2IP |  | ✓ |
| YVTMMMTD | 8 | Q53EP0 | Fibronectin type III domain-containing protein 3B | FNDC3B | ✓ |  |
| AWHPHTNKF | 9 | Q9NRG9 | Aladin | AAAS | ✓ |  |
| AYDPEINKL | 9 | O60858-3 | Isoform 3 of E3 ubiquitin-protein ligase TRIM13 | TRIM13 | ✓ |  |
| AYFLKPKEL | 9 | Q8NI36 | WD repeat-containing protein 36 | WDR36 | ✓ |  |
| AYGKDFHLI | 9 | Q8N108-12 | Isoform 2 of Mesoderm induction early response protein 1 | MIER1 | ✓ |  |
| AYIERMNYI | 9 | P07947 | Tyrosine-protein kinase Yes | YES1 | ✓ |  |
| AYLEAIHNF | 9 | P53680 | AP-2 complex subunit sigma | AP2S1 | ✓ | ✓ |
| AYSVEHNQL | 9 | Q9Y520 | Protein PRRC2C | PRRC2C | ✓ | ✓ |
| AYTPFHAVL | 9 | Q96SY0 | Integrator complex subunit 14 | INTS14 | ✓ |  |
| AYVEKVERL | 9 | Q9Y2J4 | Angiomotin-like protein 2 | AMOTL2 |  | ✓ |
| AYVHMVTHF | 9 | P55061 | Bax inhibitor 1 | TMBIM6 |  | ✓ |
| DNIPPASST | 9 | Q8IZF6-1 | Adhesion G-protein coupled receptor G4 | ADGRG4 |  | ✓ |
| ENRVLMSNM | 9 | Q5TF21 | Protein SOGA3 | SOGA3 |  | ✓ |
| EYKTVHEEL | 9 | Q9BZ29-3 | Isoform 3 of Dedicator of cytokinesis protein 9 | DOCK9 |  | ✓ |
| EYLTKVDKL | 9 | Q00610-1 | Clathrin heavy chain 1 | CLTC |  | ✓ |
| EYMKHTRLF | 9 | Q13045-1 | protein flightless-1 homolog | FLII |  | ✓ |
| EYNSDLHQF | 9 | O43683 | Mitotic checkpoint serine/threonine-protein kinase BUB1 | BUB1 | ✓ | ✓ |
| EYQKVGQSF | 9 | Q96RF0 | Sorting nexin-18 | SNX18 |  | ✓ |
| EYSKQMQRF | 9 | Q92769 | Histone deacetylase 2 | HDAC2 | ✓ | ✓ |
| EYTDVLQKI | 9 | Q8TE68-1 | Epidermal growth factor receptor kinase substrate 8-like protein 1 | EPS8L1 | ✓ |  |
| FQMPTPIQM | 9 | Q9Y2R4 | Probable ATP-dependent RNA helicase DDX52 | DDX52 | ✓ |  |
| GYGGGFGNF | 9 | P28676 | Grancalcin | GCA |  | ✓ |
| GYIERPQLI | 9 | Q6PIY7-1 | Poly(A) RNA polymerase GLD2 | PAPD4 |  | ✓ |
| HYNSHYEKF | 9 | O75129 | Astrotactin-2 | ASTN2 |  | ✓ |
| HYPPVQVLF | 9 | P52701 | DNA mismatch repair protein MSH6 | MSH6 |  | ✓ |
| IFDNVAKVW | 9 | Q15293 | Reticulocalbin-1 | RCN1 |  | ✓ |
| IYGYVAEQF | 9 | Q9Y6A9 | Signal peptidase complex subunit 1 | SPCS1 |  | ✓ |
| IYIKHPHLF | 9 | Q9H147 | Deoxynucleotidyltransferase terminal-interacting protein 1 | DNTTIP1 | ✓ | ✓ |
| IYPPQFHKV | 9 | Q9Y574 | Ankyrin repeat and SOCS box protein 4 | ASB4 | ✓ |  |
| KCSDCLMRF | 9 | Q9UID6 | Zinc finger protein 639 | ZNF639 |  | ✓ |
| KFIDTTSKF | 9 | Q92901 | 60S ribosomal protein L3-like | RPL3L | ✓ | ✓ |
| KFSPNTSQF | 9 | O43684 | Mitotic checkpoint protein BUB3 | BUB3 | ✓ | ✓ |
| KIYEGQVEV | 9 | P46777 | 60S ribosomal protein L5 | RPL5 |  | ✓ |
| KQPEEYHYL | 9 | B2RTY4 | Unconventional myosin-IXa | MYO9A |  | ✓ |
| KYFEKQFEL | 9 | Q6P1N9-1 | Putative deoxyribonuclease TATDN1 | TATDN1 |  | ✓ |
| KYFHPPAHL | 9 | Q9NUK0 | Muscleblind-like protein 3 | MBNL3 |  | ✓ |
| KYGKDFNDI | 9 | O94776 | Metastasis-associated protein MTA2 | MTA2 |  | ✓ |
| KYGSVIQLL | 9 | Q14573 | Inositol 1,4,5-trisphosphate receptor type 3 | ITPR3 | ✓ |  |
| KYIDQKFVL | 9 | Q13362-4 | Isoform 4 of Serine/threonine-protein phosphatase 2A 56 kDa regulatory subunit gamma isoform | PPP2R5C | ✓ |  |
| KYIEGVSDF | 9 | Q9Y573 | Actin-binding protein IPP | IPP | ✓ | ✓ |
| KYIHSANVL | 9 | Q16659 | Mitogen-activated protein kinase 6 | MAPK6 | ✓ | ✓ |
| KYIKLNEEM | 9 | Q4UJ75 | Ankyrin repeat domain-containing protein 20A4 | ANKRD20A4 |  | ✓ |
| KYINTDAKF | 9 | Q8TEL6 | Short transient receptor potential channel 4-associated protein | TRPC4AP | ✓ | ✓ |
| KYIQRQETI | 9 | P20591 | Interferon-induced GTP-binding protein Mx1 | MX1 |  | ✓ |
| KYISGPHEL | 9 | P49454 | Centromere protein F | CENPF | ✓ | ✓ |
| KYISKPENL | 9 | Q9Y376 | Calcium-binding protein 39 | CAB39 | ✓ | ✓ |
| KYKEDEPLF | 9 | O14977 | Antizyme inhibitor 1 | AZIN1 |  | ✓ |
| KYKGIFNGF | 9 | Q00325-1 | Phosphate carrier protein, mitochondrial | SLC25A3 |  | ✓ |
| KYLGKTHNL | 9 | Q9Y4A5 | Transformation/transcription domain-associated protein | TRRAP |  | ✓ |
| KYMEDYHQF | 9 | O60437 | periplakin | PPL | ✓ | ✓ |
| KYNDFGNSF | 9 | P17036 | Zinc finger protein 3 | ZNF3 |  | ✓ |
| KYPASSSVF | 9 | P09629 | Homeobox protein Hox-B7 | HOXB7 |  | ✓ |
| KYPENFFLL | 9 | P62136-1 | serine/threonine-protein phosphatase PP1-alpha catalytic subunit | PPP1CA | ✓ | ✓ |
| KYPNVFKKI | 9 | O43865 | adenosylhomocysteinase 2 | AHCYL1 |  | ✓ |
| KYQEEFEHF | 9 | P49257 | Protein ERGIC-53 | LMAN1 |  | ✓ |
| KYQEVTNNL | 9 | Q14444 | Caprin-1 | CAPRIN1 | ✓ | ✓ |
| KYQIINEEF | 9 | Q969F9-1 | Hermansky-pudlak syndrome 3 protein | HPS3 |  | ✓ |
| KYTKIFNDF | 9 | Q15326 | Zinc finger MYND domain-containing protein 11 | ZMYND11 |  | ✓ |
| KYTPPPHHI | 9 | O43920 | NADH dehydrogenase [ubiquinone] iron-sulfur protein 5 | NDUFS5 | ✓ | ✓ |
| KYVKDFHKF | 9 | A8MTY0 | Zinc finger protein 724 | ZNF724 | ✓ | ✓ |
| LDKKYAGLL | 9 | P43034 | Platelet-activating factor acetylhydrolase IB subunit alpha | PAFAH1B1 | ✓ |  |
| LYDPVISKL | 9 | Q96EZ8 | Microspherule protein 1 | MCRS1 | ✓ |  |
| LYNGHHHLL | 9 | Q9Y6H8 | Gap junction alpha-3 protein | GJA3 |  | ✓ |
| LYTEKFEEF | 9 | P40222 | Alpha-taxilin | TXLNA | ✓ | ✓ |
| LYWSHPRKF | 9 | P62273-2 | Isoform 2 of 40S ribosomal protein S29 | RPS29 | ✓ | ✓ |
| NYAQVFNKL | 9 | Q9Y6E2 | Basic leucine zipper and W2 domain-containing protein 2 | BZW2 | ✓ |  |
| NYARGHYTI | 9 | P68363 | Tubulin alpha-1B chain | TUBA1B |  | ✓ |
| NYGDQVQHF | 9 | Q13588 | GRB2-related adapter protein | GRAP | ✓ | ✓ |
| NYKKFYEQF | 9 | P07900 | Heat shock protein HSP 90-alpha | HSP90AA1 | ✓ | ✓ |
| NYNDRYDEI | 9 | P62424 | 60S ribosomal protein L7a | RPL7A |  | ✓ |
| NYQKRFQNL | 9 | Q9NZT2 | Opioid growth factor receptor | OGFR |  | ✓ |
| PYHPHPHVF | 9 | O00409 | Forkhead box protein N3 | FOXN3 |  | ✓ |
| QYNPHVHQL | 9 | Q8TDM6-1 | disks large homolog 5 | DLG5 | ✓ | ✓ |
| QYSDINNRW | 9 | O15020 | Spectrin beta chain, non-erythrocytic 2 | SPTBN2 |  | ✓ |
| QYTPHSHQF | 9 | Q8N122 | Regulatory-associated protein of mTOR | RPTOR | ✓ | ✓ |
| RFEEKHAYF | 9 | Q9BZJ0 | Crooked neck-like protein 1 | CRNKL1 | ✓ | ✓ |
| RYALQMEQL | 9 | P05783 | Keratin, type I cytoskeletal 18 | KRT18 | ✓ | ✓ |
| RYASTPQKF | 9 | Q9P0J1 | [Pyruvate dehydrogenase [acetyl-transferring]]-phosphatase 1, mitochondrial | PDP1 |  | ✓ |
| RYFENPQVI | 9 | Q9Y4A5 | Transformation/transcription domain-associated protein | TRRAP | ✓ | ✓ |
| RYFKGPELL | 9 | P68400 | Casein kinase II subunit alpha | CSNK2A1 | ✓ | ✓ |
| RYFKTPRKF | 9 | Q9ULV3 | Cip1-interacting zinc finger protein | CIZ1 | ✓ | ✓ |
| RYGDGGSTF | 9 | P31943 | Heterogeneous nuclear ribonucleoprotein H | HNRNPH1 |  | ✓ |
| RYGLVTNEI | 9 | Q9BYX4-1 | Interferon-induced helicase C domain-containing protein 1 | IFIH1 | ✓ |  |
| RYIPTAAAF | 9 | P61619 | Protein transport protein Sec61 subunit alpha isoform 1 | SEC61A1 | ✓ |  |
| RYLEKPMEI | 9 | P40763 | Signal transducer and activator of transcription 3 | STAT3 | ✓ | ✓ |
| RYLEVMRKL | 9 | Q15257-1 | Serine/threonine-protein phosphatase 2A activator | PTPA | ✓ | ✓ |
| RYLNEFEEL | 9 | Q9BQI3-1 | Eukaryotic translation initiation factor 2-alpha kinase 1 | EIF2AK1 |  | ✓ |
| RYLVISEKL | 9 | Q9Y546 | Leucine-rich repeat-containing protein 42 | LRRC42 |  | ✓ |
| RYMPQNPHI | 9 | Q16576-1 | Histone-binding protein RBBP7 | RBBP7 |  | ✓ |
| RYPDNLKHL | 9 | Q9P031 | Thyroid transcription factor 1-associated protein 26 | CCDC59 | ✓ | ✓ |
| RYPDSHQLF | 9 | Q9UN86 | Ras GTPase-activating protein-binding protein 2 | G3BP2 |  | ✓ |
| RYQDAIRVF | 9 | Q9Y262 | eukaryotic translation initiation factor 3 subunit L | EIF3L | ✓ |  |
| RYQKSTELL | 9 | P68431 | Histone H3.1 | HIST1H3A | ✓ | ✓ |
| RYSEYAEEF | 9 | Q9Y217-1 | Myotubularin-related protein 6 | MTMR6 |  | ✓ |
| RYSRKGFLF | 9 | O00267 | Transcription elongation factor Spt5 | SUPT5H |  | ✓ |
| RYSTQIHSF | 9 | Q7RTS1 | Class A basic helix-loop-helix protein 15 | BHLHA15 |  | ✓ |
| RYTDVSTRY | 9 | Q9Y320 | Thioredoxin-related transmembrane protein 2 | TMX2 | ✓ | ✓ |
| RYTERVDYL | 9 | Q92995 | Ubiquitin carboxyl-terminal hydrolase 13 | USP13 |  | ✓ |
| SFHNIHNTF | 9 | O43684 | Mitotic checkpoint protein BUB3 | BUB3 | ✓ | ✓ |
| SLHIHGVPP | 9 | Q9NYJ8-1 | TGF-beta-activated kinase 1 and MAP3K7-binding protein 2 | TAB2 |  | ✓ |
| SYDPDFNQL | 9 | Q9UET6 | Putative tRNA (cytidine(32)/guanosine(34)-2'-O)-methyltransferase | FTSJ1 | ✓ | ✓ |
| SYISRTNQL | 9 | Q8WYP5 | Protein ELYS | AHCTF1 |  | ✓ |
| SYMGHFDLL | 9 | Q9BWJ5 | Splicing factor 3B subunit 5 | SF3B5 | ✓ | ✓ |
| SYQKVIELF | 9 | Q96KB5 | Lymphokine-activated killer T-cell-originated protein kinase | PBK |  | ✓ |
| TLYEHNNEL | 9 | Q9NRG9 | Aladin | AAAS |  | ✓ |
| TYAKQYEEF | 9 | P25205 | DNA replication licensing factor MCM3 | MCM3 | ✓ | ✓ |
| TYGEIFEKF | 9 | O95298 | NADH dehydrogenase [ubiquinone] 1 subunit C2 | NDUFC2 | ✓ |  |
| TYLEKAIKI | 9 | Q93009 | Ubiquitin carboxyl-terminal hydrolase 7 | USP7 | ✓ | ✓ |
| TYNQKHSLF | 9 | Q9NPA3 | Mid1-interacting protein 1 | MID1IP1 | ✓ | ✓ |
| TYQDIQNTI | 9 | P24928 | DNA-directed RNA polymerase II subunit RPB1 | POLR2A |  | ✓ |
| VFIDKQTNL | 9 | Q92879-6 | CUGBP Elav-like family member 1 | CELF1 | ✓ | ✓ |
| VLAVLAVLA | 9 | Q95604 | HLA class I histocompatibility antigen, Cw-17 alpha chain | HLA-C | ✓ |  |
| VLPKLYVKL | 9 | P62854 | 40S ribosomal protein S26 | RPS26 | ✓ |  |
| VSEPRYFQL | 9 | Q8IXH7 | Negative elongation factor C/D | NELFCD | ✓ |  |
| VYAQKHQQL | 9 | Q9UPN9-1 | E3 ubiquitin-protein ligase TRIM33 | TRIM33 |  | ✓ |
| VYHKPPNAF | 9 | P63010-1 | AP-2 complex subunit beta | AP2B1 |  | ✓ |
| VYIEKNDKL | 9 | P21860 | Receptor tyrosine-protein kinase erbB-3 | ERBB3 | ✓ | ✓ |
| VYIKHPVSL | 9 | P48556 | 26S proteasome non-ATPase regulatory subunit 8 | PSMD8 | ✓ | ✓ |
| VYISEHEHF | 9 | O96005 | Cleft lip and palate transmembrane protein 1 | CLPTM1 | ✓ | ✓ |
| VYLDKFIRL | 9 | Q9NVN8 | Guanine nucleotide-binding protein-like 3-like protein | GNL3L | ✓ |  |
| VYPPHSHSI | 9 | P42226 | Signal transducer and activator of transcription 6 | STAT6 |  | ✓ |
| VYPPPHQVF | 9 | P13051 | Uracil-DNA glycosylase | UNG |  | ✓ |
| VYTSGVYHI | 9 | Q63HR2 | tensin-2 | TNS2 |  | ✓ |
| YGSGNYNDF | 9 | P22626 | Heterogeneous nuclear ribonucleoproteins A2/B1 | HNRNPA2B1 |  | ✓ |
| YYDKHFTEF | 9 | P38606 | V-type proton ATPase catalytic subunit A | ATP6V1A | ✓ | ✓ |
| YYEHVKARF | 9 | Q9BV36 | Melanophilin | MLPH |  | ✓ |
| YYEKLHTYF | 9 | P16144-1 | Integrin beta-4 | ITGB4 | ✓ | ✓ |
| YYQDTPKQI | 9 | Q9Y3C1 | nucleolar protein 16 | NOP16 | ✓ | ✓ |
| YYSPHGHIL | 9 | Q9BY44-1 | Eukaryotic translation initiation factor 2A | EIF2A | ✓ |  |
| AWAPKPYHKF | 10 | O95819 | Mitogen-activated protein kinase kinase kinase kinase 4 | MAP4K4 | ✓ | ✓ |
| AYGHFGRDSF | 10 | P31153 | S-adenosylmethionine synthase isoform type-2 | MAT2A |  | ✓ |
| EYPDRIMNTF | 10 | Q13509 | tubulin beta-3 chain | TUBB3 | ✓ | ✓ |
| EYYDKHFTEF | 10 | P38606 | V-type proton ATPase catalytic subunit A | ATP6V1A |  | ✓ |
| IYHNPTANSF | 10 | P50552 | Vasodilator-stimulated phosphoprotein | VASP | ✓ | ✓ |
| KWNPTAGVAF | 10 | P19387 | DNA-directed RNA polymerase II subunit RPB3 | POLR2C |  | ✓ |
| KYKAPGEEFF | 10 | Q9UFC0 | Leucine-rich repeat and WD repeat-containing protein 1 | LRWD1 |  | ✓ |
| KYQDAPAAQF | 10 | Q14145 | Kelch-like ECH-associated protein 1 | KEAP1 |  | ✓ |
| KYVEEQPGHL | 10 | Q6UXV4 | MICOS complex subunit MIC27 | APOOL |  | ✓ |
| LFPCLSPLLL | 10 | Q6KF10 | Growth/differentiation factor 6 | GDF6 |  | ✓ |
| LTAFLAEMLL | 10 | Q8TC94 | Actin-like protein 9 | ACTL9 |  | ✓ |
| LYADVGGKQF | 10 | P51571 | Translocon-associated protein subunit delta | SSR4 | ✓ | ✓ |
| MDVINSARTR | 10 | Q32NB8 | CDP-diacylglycerol--glycerol-3-phosphate 3-phosphatidyltransferase, mitochondrial | PGS1 | ✓ |  |
| MKHVHPTTAP | 10 | Q6WCQ1 | Myosin phosphatase Rho-interacting protein | MPRIP | ✓ | ✓ |
| RFYKQLSATE | 10 | P78368 | Casein kinase I isoform gamma-2 | CSNK1G2 |  | ✓ |
| RQLSKAQKHR | 10 | Q14674-1 | Separin | ESPL1 |  | ✓ |
| RYFDPANGKF | 10 | P13639 | Elongation factor 2 | EEF2 | ✓ | ✓ |
| RYLENGKETL | 10 | P05534; P10321 | HLA class I histocompatibility antigen, A-24 alpha chain | HLA-A | ✓ | ✓ |
| RYPNSHTHYF | 10 | A5YKK6 | CCR4-NOT transcription complex subunit 1 | CNOT1 |  | ✓ |
| TYSPALNKMF | 10 | P04637-3 | Isoform 3 of Cellular tumor antigen p53 | TP53 | ✓ |  |
| TYTDVTPRQF | 10 | Q9NQZ5 | StAR-related lipid transfer protein 7, mitochondrial | STARD7 | ✓ | ✓ |
| VYAALQRQLL | 10 | Q15149 | Plectin | PLEC | ✓ |  |
| VYNSWKNNKF | 10 | Q14562 | ATP-dependent RNA helicase DHX8 | DHX8 |  | ✓ |
| YYSHLEGARF | 10 | O60287 | Nucleolar pre-ribosomal-associated protein 1 | URB1 |  | ✓ |
| EFHDSSDHHTF | 11 | Q15293 | Reticulocalbin-1 | RCN1 | ✓ | ✓ |
| KYFSDGSSNTF | 11 | Q9Y2F9-1 | BTB/POZ domain-containing protein 3 | BTBD3 |  | ✓ |
| KYLEERAMRQF | 11 | Q9Y2J4 | Angiomotin-like protein 2 | AMOTL2 |  | ✓ |
| NSSRWEHLIYQ | 11 | Q96NU7 | Probable imidazolonepropionase | AMDHD1 |  | ✓ |
| RYISPDQLADL | 11 | P06733-1 | alpha-enolase | ENO1 | ✓ |  |
| RYSTGLAGNLL | 11 | P0CG13-1 | Chromosome transmission fidelity protein 8 homolog | CHTF8 | ✓ |  |
| VLAVLAVLAVLA | 12 | Q95604 | HLA class I histocompatibility antigen, Cw-17 alpha chain | HLA-C | ✓ |  |
